# Supplementary material
Source: PubMed Central journal article supplement (PMC7225675)
Supplement: djz166_supplementary_data.pdf [file djz166_supplementary_data.pdf]

## SUPPLEMENTARY MATERIALS

### Supplementary Methods

#### ***Biological reproducibility of bile acid concentrations***

Prior to the present analyses on BAs and colon cancer risk, we evaluated the biological reproducibility of the BA metabolites using fasting plasma samples of participants of the EPIC-Heidelberg cohort (that was initially started in 1994 as part of the Europe-wide EPIC cohort). These participants were re-invited to the EPIC-Heidelberg study center (German Cancer Research Center, Heidelberg, Germany) for a sub-study on diet, physical activity, and body composition between 2010 and 2013 (1). They provided blood samples at two examinations, which were carried out one year apart. Out of the 799 participants of this sub-study, we randomly selected 50 individuals (50 % women, mean age 65.0 years, free of cancer and major cardiovascular diseases) for our reproducibility study. BAs were measured by the same validated method as the BAs in our main study (2) at the Health Research Institute Hospital La Fe (Valencia, Spain).

To test the biological reproducibility of BA concentrations over one year, we obtained Spearman's correlation coefficients (see Supplementary Table 1 below). The majority of BA metabolites (CA, CDCA, TCA, TCDCA, DCA, GDCA, TDCA, GUDCA, and GHCA) showed good biological reproducibility over one year, with Spearman's coefficients of  $\rho > 0.5$  to 0.78. Modest reproducibility ( $\rho > 0.3-0.5$ ) was observed for GCA, GLCA, TUDCA, HCA, and TaMCA. Reproducibility was poor ( $\rho < 0.3$ ) for UDCA, and THCA was not detectable in a majority of samples.

#### ***Cross-sectional associations between bile acids and covariates among the controls***

Associations between bile acid concentrations and covariates were evaluated by Generalized Linear Models adjusted for age, sex, fasting status, smoking status, education level, physical activity level, BMI, height, and consumption of alcohol, fiber, red and processed meat, fat, and energy. Multivariable adjusted geometric means (95 % confidence intervals) of bile acid levels across covariate strata were calculated by the least-squares means method. P values for linear trend were obtained modelling covariate strata as continuous variables.

### ***Correction of odds ratios from logistic regression analyses for measurement error***

As described by Frost and Thompson (3), we used the data from the reproducibility study outlined above to correct odds ratios and 95 % confidence intervals from multivariable logistic regression analyses for regression dilution due to measurement error, using product-moment correlation coefficients. As we did not have information on the reproducibility of covariates, we assumed that these would be stable over time. Our correction for measurement error is further based on the assumption that the results of our one-year reproducibility study among 50 participants of the EPIC-Heidelberg cohort are representative and generalizable.

### ***References***

1. Kühn T, Sookthai D, Rolle-Kampczyk U, Otto W, von Bergen M, Kaaks R, et al. Mid- and long-term correlations of plasma metabolite concentrations measured by a targeted metabolomics approach. *Metabolomics*. 2016;12(12):184.
2. Garcia-Canaveras JC, Donato MT, Castell JV, Lahoz A. Targeted profiling of circulating and hepatic bile acids in human, mouse, and rat using a UPLC-MRM-MS-validated method. *Journal of lipid research*. 2012;53(10):2231-41.
3. Frost C, Thompson SG. Correcting for regression dilution bias: comparison of methods for a single predictor variable. *JSTOR*. 2000;163(2):173-89.

## Supplementary Figure

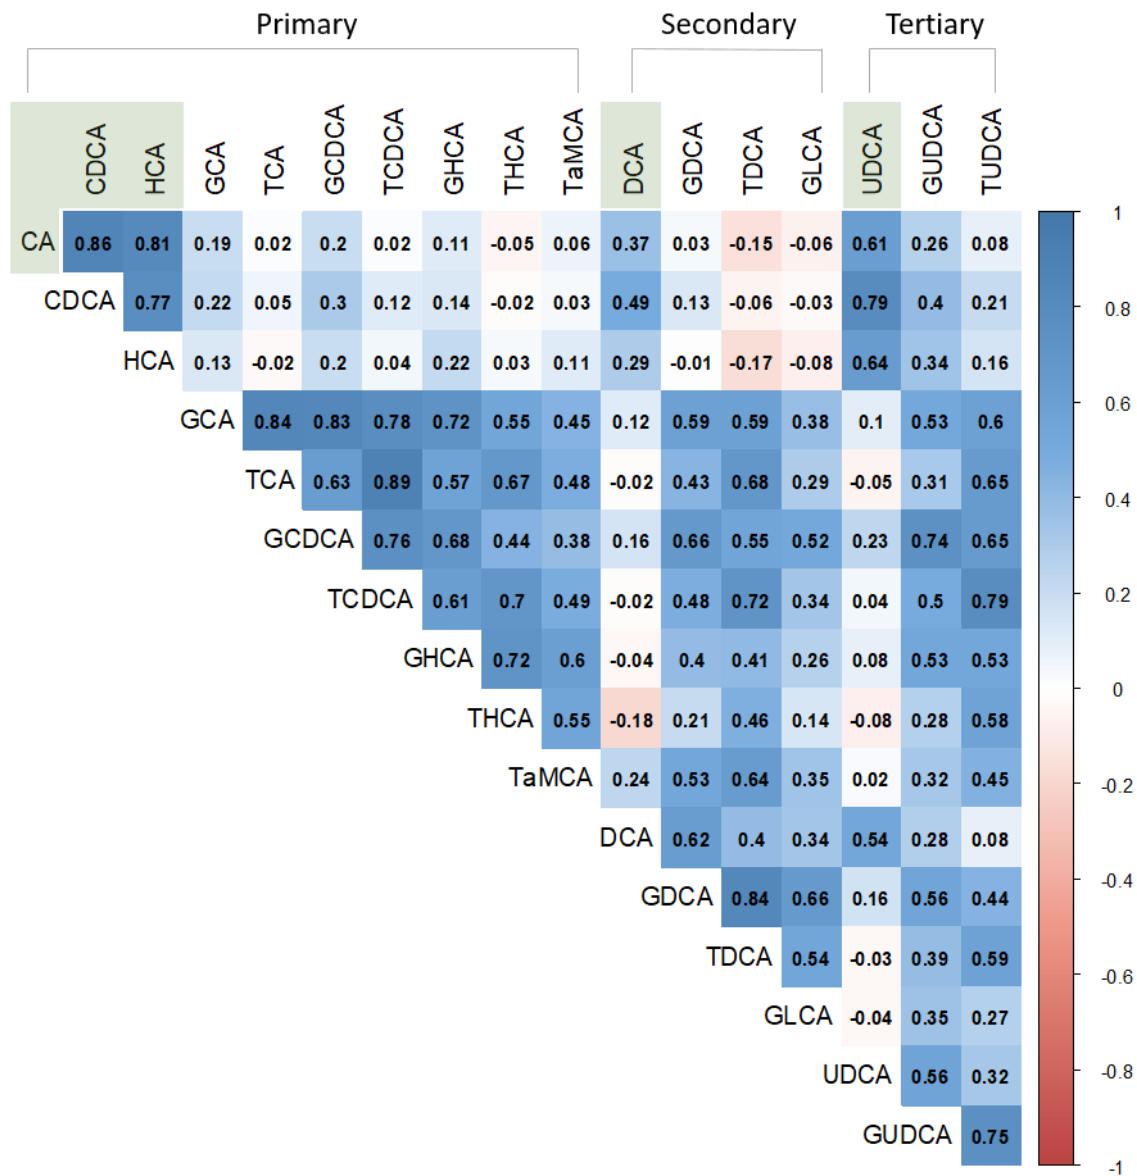

**Supplementary Figure 1. Inter-correlations between bile acid metabolites**

Spearman's correlations between bile acid metabolites among the controls (n=569); bile acids marked in green are unconjugated metabolites, all others are conjugated metabolites. CA (Cholic Acid); CDCA (Chenodeoxycholic Acid); DCA (Deoxycholic Acid); GCA (Glycocholic Acid); GCDCA (Glycochenodeoxycholic Acid); GDCA (Glycodeoxycholic Acid); GHCA (Glycohyocholic Acid); GLCA (Glycolithocholic Acid); GUDCA (Glycoursodeoxycholic Acid); HCA (Hyochocholic Acid); TaMCA (Tauro-Alpha-Muricholic Acid); TCA (Taurocholic Acid); TCDCA (Taurochenodeoxycholic Acid); TDCA (Taurodeoxycholic Acid); TUDCA (Tauroursodeoxycholic Acid); UDCA (Ursodeoxycholic Acid);

## Supplementary Tables

**Supplementary Table 1** One-year biological reproducibility of bile acid concentrations in a subsample of the EPIC-Heidelberg cohort (n=50)

| Bile acid metabolite                | N missing values | Spearman's $\rho^*$ |
|-------------------------------------|------------------|---------------------|
| Primary bile acids, unconjugated    |                  |                     |
| Cholic Acid (CA)                    | 0                | 0.59                |
| Chenodeoxycholic Acid (CDCA)        | 0                | 0.66                |
| Hyocholic Acid (HCA)                | 23               | 0.45                |
| Primary bile acids, conjugated      |                  |                     |
| Glycocholic Acid (GCA)              | 0                | 0.49                |
| Taurocholic Acid (TCA)              | 0                | 0.59                |
| Glycochenodeoxycholic Acid (GCDCA)  | 0                | 0.55                |
| Taurochenodeoxycholic Acid (TCDCA)  | 0                | 0.60                |
| Glycohyocholic Acid (GHCA)          | 1                | 0.53                |
| Taurohyocholic Acid (THCA)          | 40               | -                   |
| Tauro-Alpha-Muricholic Acid (TaMCA) | 11               | 0.44                |
| Secondary bile acids, unconjugated  |                  |                     |
| Deoxycholic Acid (DCA)              | 1                | 0.70                |
| Secondary bile acids, conjugated    |                  |                     |
| Glycodeoxycholic Acid (GDCA)        | 1                | 0.78                |
| Taurodeoxycholic Acid (TDCA)        | 4                | 0.67                |
| Glycolithocholic Acid (GLCA)        | 3                | 0.31                |
| Tertiary bile acids, unconjugated   |                  |                     |
| Ursodeoxycholic Acid (UDCA)         | 15               | 0.01                |
| Tertiary bile acids, conjugated     |                  |                     |
| Glycoursodeoxycholic Acid (GUDCA)   | 0                | 0.55                |
| Tauroursodeoxycholic Acid (TUDCA)   | 19               | 0.30                |

\*All correlations over one year were statistically significant at p-values <0.05, except for the correlations between plasma levels of UDCA;

**Supplementary Table 2** Number of study participants with bile acid concentrations below the limit of detection

| <b>Bile acid metabolite</b>         | <b>Classification</b>   | <b>N (%) values below the limit of detection among cases / controls</b> |
|-------------------------------------|-------------------------|-------------------------------------------------------------------------|
| Cholic Acid (CA)                    | Primary, unconjugated   | 3/6 (0.5%/1.1%)                                                         |
| Chenodeoxycholic Acid (CDCA)        | Primary, unconjugated   | 1/4 (0.2%/0.7%)                                                         |
| Hyocholic Acid (HCA)                | Primary, unconjugated   | 74/79 (13%/13.9%)                                                       |
| Glycocholic Acid (GCA)              | Primary, conjugated     | 0/0                                                                     |
| Taurocholic Acid (TCA)              | Primary, conjugated     | 6/7 (1.1%/1.2%)                                                         |
| Glycochenodeoxycholic Acid (GCDCA)  | Primary, conjugated     | 0/0                                                                     |
| Taurochenodeoxycholic (TCDCA)       | Primary, conjugated     | 2/1 (0.4%/0.2%)                                                         |
| Glycohyocholic Acid (GHCA)          | Primary, conjugated     | 9/5 (1.6%/0.9%)                                                         |
| Taurohyocholic Acid (THCA)          | Primary, conjugated     | 307/286 (54%/50.3%)                                                     |
| Tauro-Alpha-Muricholic Acid (TaMCA) | Primary, conjugated     | 104/80 (18.3%/14.1%)                                                    |
| Deoxycholic Acid (DCA)              | Secondary, unconjugated | 3/4 (0.5%/0.7%)                                                         |
| Glycodeoxycholic Acid (GDCA)        | Secondary, conjugated   | 2/4 (0.4%/0.7%)                                                         |
| Taurodeoxycholic Acid (TDCA)        | Secondary, conjugated   | 21/16 (3.7%/2.8%)                                                       |
| Glycolithocholic Acid (GLCA)        | Secondary, conjugated   | 10/10 (1.8%/1.8%)                                                       |
| Ursodeoxycholic Acid (UDCA)         | Tertiary, unconjugated  | 87/84 (15.3%/14.8%)                                                     |
| Glycoursodeoxycholic Acid (GUDCA)   | Tertiary, conjugated    | 3/3 (0.5%/0.5%)                                                         |
| Tauroursodeoxycholic Acid (TUDCA)   | Tertiary, conjugated    | 163/154 (28.6%/27.1%)                                                   |

**Supplementary Table 3** Geometric means (95% confidence intervals) of plasma bile acid concentrations, stratified by sex

| Bile Acid* | Sex    | Frequency  | Geometric Mean (95% CI) | P†     |
|------------|--------|------------|-------------------------|--------|
| CA         | Male   | 214 (37.3) | 97.2 (52.5,180.1)       | 0.007  |
|            | Female | 360 (62.7) | 54.4 (30.2,98.2)        |        |
| CDCA       | Male   | 214 (37.3) | 189.3 (108.9,329.2)     | 0.003  |
|            | Female | 360 (62.7) | 108.0 (63.6,183.3)      |        |
| GCA        | Male   | 214 (37.3) | 189.1 (126.7,282.2)     | <0.001 |
|            | Female | 360 (62.7) | 109.8 (74.9,161.1)      |        |
| TCA        | Male   | 214 (37.3) | 19.8 (12.3,32.0)        | 0.08   |
|            | Female | 360 (62.7) | 14.8 (9.4,23.4)         |        |
| GCDCA      | Male   | 214 (37.3) | 760.9 (529.8,1092.8)    | <0.001 |
|            | Female | 360 (62.7) | 498.9 (352.8,705.3)     |        |
| TCDCA      | Male   | 214 (37.3) | 74.7 (48.9,113.9)       | 0.15   |
|            | Female | 360 (62.7) | 60.4 (40.3,90.5)        |        |
| DCA        | Male   | 214 (37.3) | 172.9 (106.6,280.6)     | 0.32   |
|            | Female | 360 (62.7) | 146.7 (92.3,233.1)      |        |
| GDCA       | Male   | 214 (37.3) | 154.9 (99.0,242.4)      | 0.18   |
|            | Female | 360 (62.7) | 125.8 (81.9,193.0)      |        |
| TDCA       | Male   | 214 (37.3) | 19.8 (12.3,31.8)        | 0.85   |
|            | Female | 360 (62.7) | 20.4 (12.9,32.2)        |        |
| GLCA       | Male   | 214 (37.3) | 17.8 (11.8,26.9)        | 0.40   |
|            | Female | 360 (62.7) | 15.9 (10.7,23.5)        |        |
| UDCA       | Male   | 214 (37.3) | 19.1 (11.0,33.3)        | 0.11   |
|            | Female | 360 (62.7) | 14.1 (8.3,24.0)         |        |
| GUDCA      | Male   | 214 (37.3) | 85.1 (57.0,127.0)       | 0.03   |
|            | Female | 360 (62.7) | 62.9 (42.9,92.2)        |        |
| TUDCA      | Male   | 214 (37.3) | 3.7 (2.7,5.1)           | 0.46   |
|            | Female | 360 (62.7) | 3.4 (2.5,4.7)           |        |
| HCA        | Male   | 214 (37.3) | 8.1 (5.1,12.9)          | 0.002  |
|            | Female | 360 (62.7) | 5.0 (3.2,7.8)           |        |
| GHCA       | Male   | 214 (37.3) | 13.3 (10.2,17.3)        | <0.001 |
|            | Female | 360 (62.7) | 9.6 (7.5,12.4)          |        |
| THCA       | Male   | 214 (37.3) | 2.6 (2.1,3.3)           | 0.01   |
|            | Female | 360 (62.7) | 2.1 (1.7,2.7)           |        |
| TaMCA      | Male   | 214 (37.3) | 4.9 (3.4,7.0)           | 0.73   |
|            | Female | 360 (62.7) | 5.1 (3.6,7.2)           |        |

Geometric means (95 % confidence intervals) from Generalized Linear Models adjusted for age, fasting status, smoking status, education level, physical activity level, BMI, height, and consumption of alcohol, fiber, red and processed meat, fat, and energy;

\*CA (Cholic Acid); CDCA (Chenodeoxycholic Acid); DCA (Deoxycholic Acid); GCA (Glycocholic Acid); GCDCA (Glycochenodeoxycholic Acid); GDCA (Glycodeoxycholic Acid); GHCA (Glycohyocholic Acid); GLCA (Glycolithocholic Acid); GUDCA (Glycoursodeoxycholic Acid); HCA (Hyocholic Acid); TaMCA (Tauro-Alpha-Muricholic Acid); TCA (Taurocholic Acid); TCDCA (Taurochenodeoxycholic Acid); TDCA (Taurodeoxycholic Acid); THCA (Taurohyocholic Acid); TUDCA (Tauroursodeoxycholic Acid); UDCA (Ursodeoxycholic Acid);

†Two-sided P value for difference from Generalized Linear Models;

**Supplementary Table 4** Geometric means (95% confidence intervals) of plasma bile acid concentrations across strata of fasting duration

| Bile Acid* | Fasting Duration | Frequency  | Geometric Mean (95% CI) | P†     |
|------------|------------------|------------|-------------------------|--------|
| CA         | >6 hours         | 108 (18.8) | 66.3 (35.7,123.1)       | 0.70   |
|            | 3-6 hours        | 91 (15.9)  | 75.1 (40.0,141.2)       |        |
|            | <3 hours         | 375 (65.3) | 77.2 (43.6,136.7)       |        |
| CDCA       | >6 hours         | 108 (18.8) | 149.8 (86.0,260.9)      | 0.86   |
|            | 3-6 hours        | 91 (15.9)  | 142.4 (80.8,250.9)      |        |
|            | <3 hours         | 375 (65.3) | 137.1 (82.1,228.8)      |        |
| GCA        | >6 hours         | 108 (18.8) | 189.1 (126.5,282.6)     | <0.001 |
|            | 3-6 hours        | 91 (15.9)  | 194.2 (128.9,292.7)     |        |
|            | <3 hours         | 375 (65.3) | 81.5 (56.2,118.1)       |        |
| TCA        | >6 hours         | 108 (18.8) | 22.4 (13.8,36.1)        | <0.001 |
|            | 3-6 hours        | 91 (15.9)  | 23.6 (14.4,38.5)        |        |
|            | <3 hours         | 375 (65.3) | 9.5 (6.1,14.9)          |        |
| GCDCA      | >6 hours         | 108 (18.8) | 863.5 (600.6,1241.6)    | <0.001 |
|            | 3-6 hours        | 91 (15.9)  | 772.6 (533.4,1119.3)    |        |
|            | <3 hours         | 375 (65.3) | 350.5 (250.7,490.2)     |        |
| TCDC       | >6 hours         | 108 (18.8) | 93.1 (61.0,142.3)       | <0.001 |
|            | 3-6 hours        | 91 (15.9)  | 87.0 (56.4,134.1)       |        |
|            | <3 hours         | 375 (65.3) | 37.4 (25.3,55.3)        |        |
| DCA        | >6 hours         | 108 (18.8) | 195.0 (120.0,316.9)     | 0.01   |
|            | 3-6 hours        | 91 (15.9)  | 159.2 (97.0,261.3)      |        |
|            | <3 hours         | 375 (65.3) | 130.1 (83.1,203.7)      |        |
| GDCA       | >6 hours         | 108 (18.8) | 212.9 (135.9,333.5)     | <0.001 |
|            | 3-6 hours        | 91 (15.9)  | 178.3 (112.7,281.9)     |        |
|            | <3 hours         | 375 (65.3) | 71.7 (47.3,108.5)       |        |
| TDCA       | >6 hours         | 108 (18.8) | 31.5 (19.5,50.8)        | <0.001 |
|            | 3-6 hours        | 91 (15.9)  | 25.8 (15.9,42.0)        |        |
|            | <3 hours         | 375 (65.3) | 10.0 (6.4,15.5)         |        |
| GLCA       | >6 hours         | 108 (18.8) | 27.9 (18.5,42.0)        | <0.001 |
|            | 3-6 hours        | 91 (15.9)  | 19.2 (12.6,29.2)        |        |
|            | <3 hours         | 375 (65.3) | 8.9 (6.1,13.0)          |        |
| UDCA       | >6 hours         | 108 (18.8) | 15.3 (8.8,26.7)         | 0.79   |
|            | 3-6 hours        | 91 (15.9)  | 17.2 (9.8,30.4)         |        |
|            | <3 hours         | 375 (65.3) | 16.9 (10.1,28.2)        |        |
| GUDCA      | >6 hours         | 108 (18.8) | 87.9 (58.8,131.3)       | <0.001 |
|            | 3-6 hours        | 91 (15.9)  | 89.3 (59.3,134.6)       |        |
|            | <3 hours         | 375 (65.3) | 49.9 (34.4,72.2)        |        |
| TUDCA      | >6 hours         | 108 (18.8) | 4.2 (3.0,5.8)           | <0.001 |
|            | 3-6 hours        | 91 (15.9)  | 4.2 (3.0,5.8)           |        |
|            | <3 hours         | 375 (65.3) | 2.6 (1.9,3.5)           |        |
| HCA        | >6 hours         | 108 (18.8) | 6.7 (4.2,10.7)          | 0.04   |
|            | 3-6 hours        | 91 (15.9)  | 5.2 (3.3,8.4)           |        |
|            | <3 hours         | 375 (65.3) | 7.4 (4.8,11.4)          |        |

Table continued on next page;

**Supplementary Table 4 (continued)** Geometric means (95% confidence intervals) of plasma bile acid concentrations across strata of fasting duration

| Bile Acid* | Fasting Duration | Frequency  | Geometric Mean (95% CI) | P†     |
|------------|------------------|------------|-------------------------|--------|
| GHCA       | >6 hours         | 108 (18.8) | 13.3 (10.2,17.3)        | <0.001 |
|            | 3-6 hours        | 91 (15.9)  | 12.5 (9.5,16.4)         |        |
|            | <3 hours         | 375 (65.3) | 8.7 (6.8,11.1)          |        |
| THCA       | >6 hours         | 108 (18.8) | 2.8 (2.2,3.6)           | <0.001 |
|            | 3-6 hours        | 91 (15.9)  | 2.4 (1.9,3.1)           |        |
|            | <3 hours         | 375 (65.3) | 1.9 (1.5,2.4)           |        |
| TaMCA      | >6 hours         | 108 (18.8) | 6.3 (4.4,9.0)           | <0.001 |
|            | 3-6 hours        | 91 (15.9)  | 5.8 (4.0,8.3)           |        |
|            | <3 hours         | 375 (65.3) | 3.4 (2.5,4.8)           |        |

Geometric means (95 % confidence intervals) from Generalized Linear Models adjusted for age, sex, smoking status, education level, physical activity level, BMI, height, and consumption of alcohol, fiber, red and processed meat, fat, and energy; \*CA (Cholic Acid); CDCA (Chenodeoxycholic Acid); DCA (Deoxycholic Acid); GCA (Glycocholic Acid); GCDCA (Glycochenodeoxycholic Acid); GDCA (Glycodeoxycholic Acid); GHCA (Glycohyocholic Acid); GLCA (Glycolithocholic Acid); GUDCA (Glycoursodeoxycholic Acid); HCA (Hyocholic Acid); TaMCA (Tauro-Alpha-Muricholic Acid); TCA (Taurocholic Acid); TCDCA (Taurochenodeoxycholic Acid); TDCA (Taurodeoxycholic Acid); THCA (Taurohyocholic Acid); TUDCA (Tauroursodeoxycholic Acid); UDCA (Ursodeoxycholic Acid);

†Two-sided P value for linear trend from Generalized Linear Models;



**Supplementary Table 5** Geometric means (95% confidence intervals) of plasma bile acid concentrations across strata of BMI

| <b>Bile Acid*</b> | <b>BMI</b>           | <b>Frequency</b> | <b>Geometric Mean (95% CI)</b> | <b>P†</b> |
|-------------------|----------------------|------------------|--------------------------------|-----------|
| CA                | Normal Weight (< 25) | 200 (34.8)       | 58.3 (31.8,106.9)              | 0.02      |
|                   | Overweight (25-29.9) | 281 (49)         | 79.9 (44.9,142.1)              |           |
|                   | Obese (≥30)          | 93 (16.2)        | 99.8 (52.0,191.3)              |           |
| CDCA              | Normal Weight (< 25) | 200 (34.8)       | 118.0 (68.6,203.2)             | 0.003     |
|                   | Overweight (25-29.9) | 281 (49)         | 152.9 (91.2,256.3)             |           |
|                   | Obese (≥30)          | 93 (16.2)        | 216.0 (120.5,387.2)            |           |
| GCA               | Normal Weight (< 25) | 200 (34.8)       | 145.0 (98.0,214.4)             | 0.85      |
|                   | Overweight (25-29.9) | 281 (49)         | 143.7 (99.1,208.5)             |           |
|                   | Obese (≥30)          | 93 (16.2)        | 153.6 (100.9,233.9)            |           |
| TCA               | Normal Weight (< 25) | 200 (34.8)       | 17.3 (10.8,27.5)               | 0.84      |
|                   | Overweight (25-29.9) | 281 (49)         | 17.3 (11.1,27.0)               |           |
|                   | Obese (≥30)          | 93 (16.2)        | 15.9 (9.6,26.3)                |           |
| GCDCA             | Normal Weight (< 25) | 200 (34.8)       | 632.8 (444.6,900.6)            | 0.27      |
|                   | Overweight (25-29.9) | 281 (49)         | 601.6 (430.1,841.5)            |           |
|                   | Obese (≥30)          | 93 (16.2)        | 715.1 (489.4,1044.8)           |           |
| TCDC              | Normal Weight (< 25) | 200 (34.8)       | 70.9 (46.9,107.1)              | 0.73      |
|                   | Overweight (25-29.9) | 281 (49)         | 65.7 (44.4,97.3)               |           |
|                   | Obese (≥30)          | 93 (16.2)        | 68.6 (44.0,106.9)              |           |
| DCA               | Normal Weight (< 25) | 200 (34.8)       | 131.3 (81.7,211.0)             | 0.02      |
|                   | Overweight (25-29.9) | 281 (49)         | 174.6 (111.2,274.0)            |           |
|                   | Obese (≥30)          | 93 (16.2)        | 181.7 (109.2,302.5)            |           |
| GDCA              | Normal Weight (< 25) | 200 (34.8)       | 132.8 (85.7,205.8)             | 0.53      |
|                   | Overweight (25-29.9) | 281 (49)         | 142.6 (94.0,216.3)             |           |
|                   | Obese (≥30)          | 93 (16.2)        | 156.1 (97.5,249.9)             |           |
| TDCA              | Normal Weight (< 25) | 200 (34.8)       | 19.4 (12.2,30.9)               | 0.88      |
|                   | Overweight (25-29.9) | 281 (49)         | 20.5 (13.2,31.9)               |           |
|                   | Obese (≥30)          | 93 (16.2)        | 20.1 (12.2,33.1)               |           |
| GLCA              | Normal Weight (< 25) | 200 (34.8)       | 15.8 (10.6,23.6)               | 0.57      |
|                   | Overweight (25-29.9) | 281 (49)         | 17.3 (11.8,25.3)               |           |
|                   | Obese (≥30)          | 93 (16.2)        | 15.9 (10.3,24.4)               |           |
| UDCA              | Normal Weight (< 25) | 200 (34.8)       | 13.9 (8.1,24.0)                | 0.11      |
|                   | Overweight (25-29.9) | 281 (49)         | 17.7 (10.6,29.7)               |           |
|                   | Obese (≥30)          | 93 (16.2)        | 18.9 (10.5,33.8)               |           |
| GUDCA             | Normal Weight (< 25) | 200 (34.8)       | 77.8 (52.7,115.0)              | 0.33      |
|                   | Overweight (25-29.9) | 281 (49)         | 70.7 (48.7,102.4)              |           |
|                   | Obese (≥30)          | 93 (16.2)        | 82.3 (54.1,125.1)              |           |
| TUDCA             | Normal Weight (< 25) | 200 (34.8)       | 3.8 (2.7,5.2)                  | 0.47      |
|                   | Overweight (25-29.9) | 281 (49)         | 3.5 (2.5,4.7)                  |           |
|                   | Obese (≥30)          | 93 (16.2)        | 3.7 (2.6,5.2)                  |           |
| HCA               | Normal Weight (< 25) | 200 (34.8)       | 5.9 (3.8,9.3)                  | 0.51      |
|                   | Overweight (25-29.9) | 281 (49)         | 6.7 (4.3,10.3)                 |           |
|                   | Obese (≥30)          | 93 (16.2)        | 6.6 (4.0,10.7)                 |           |
| GHCA              | Normal Weight (< 25) | 200 (34.8)       | 12.3 (9.5,15.9)                | 0.09      |
|                   | Overweight (25-29.9) | 281 (49)         | 10.9 (8.5,13.9)                |           |
|                   | Obese (≥30)          | 93 (16.2)        | 10.5 (7.9,13.8)                |           |

Table continued on next page;

**Supplementary Table 5 (continued)** Geometric means (95% confidence intervals) of plasma bile acid concentrations across strata of BMI

| Bile Acid* | BMI                  | Frequency  | Geometric Mean (95% CI) | P†   |
|------------|----------------------|------------|-------------------------|------|
| THCA       | Normal Weight (< 25) | 200 (34.8) | 2.5 (2.0,3.2)           | 0.05 |
|            | Overweight (25-29.9) | 281 (49)   | 2.3 (1.8,2.9)           |      |
|            | Obese (≥30)          | 93 (16.2)  | 2.1 (1.6,2.7)           |      |
| TaMCA      | Normal Weight (< 25) | 200 (34.8) | 5.1 (3.6,7.2)           | 0.68 |
|            | Overweight (25-29.9) | 281 (49)   | 5.0 (3.6,7.0)           |      |
|            | Obese (≥30)          | 93 (16.2)  | 4.6 (3.1,6.7)           |      |

Geometric means (95 % confidence intervals) from Generalized Linear Models adjusted for age, sex, fasting status, smoking status, education level, physical activity level, height, and consumption of alcohol, fiber, red and processed meat, fat, and energy;

\*CA (Cholic Acid); CDCA (Chenodeoxycholic Acid); DCA (Deoxycholic Acid); GCA (Glycocholic Acid); GCDCA (Glycochenodeoxycholic Acid); GDCA (Glycodeoxycholic Acid); GHCA (Glycohyocholic Acid); GLCA (Glycolithocholic Acid); GUDCA (Glycoursodeoxycholic Acid); HCA (Hyocholic Acid); TaMCA (Tauro-Alpha-Muricholic Acid); TCA (Taurocholic Acid); TCDCA (Taurochenodeoxycholic Acid); TDCA (Taurodeoxycholic Acid); THCA (Taurohyocholic Acid); TUDCA (Tauroursodeoxycholic Acid); UDCA (Ursodeoxycholic Acid);

†Two-sided P value for linear trend from Generalized Linear Models;

**Supplementary Table 6** Geometric means (95% confidence intervals) of plasma bile acid concentrations across quartiles of red and processed meat consumption

| Bile Acid* | Red and processed meat consumption | Frequency  | Geometric Mean (95% CI) | P†   |
|------------|------------------------------------|------------|-------------------------|------|
| CA         | Quartile 1                         | 143 (24.9) | 76.0 (40.8,141.5)       | 0.90 |
|            | Quartile 4                         | 143 (24.9) | 74.1 (40.2,136.9)       |      |
| CDCA       | Quartile 1                         | 143 (24.9) | 140.5 (80.4,245.4)      | 0.99 |
|            | Quartile 4                         | 143 (24.9) | 148.0 (85.4,256.6)      |      |
| GCA        | Quartile 1                         | 143 (24.9) | 141.6 (94.6,211.8)      | 0.67 |
|            | Quartile 4                         | 143 (24.9) | 152.2 (102.3,226.5)     |      |
| TCA        | Quartile 1                         | 143 (24.9) | 16.3 (10.1,26.4)        | 0.67 |
|            | Quartile 4                         | 143 (24.9) | 18.1 (11.3,29.1)        |      |
| GCDCA      | Quartile 1                         | 143 (24.9) | 591.1 (410.8,850.5)     | 0.56 |
|            | Quartile 4                         | 143 (24.9) | 641.8 (448.2,918.9)     |      |
| TCDCA      | Quartile 1                         | 143 (24.9) | 63.5 (41.6,97.0)        | 0.56 |
|            | Quartile 4                         | 143 (24.9) | 69.3 (45.7,105.3)       |      |
| DCA        | Quartile 1                         | 143 (24.9) | 171.5 (105.6,278.7)     | 0.79 |
|            | Quartile 4                         | 143 (24.9) | 159.1 (98.5,256.8)      |      |
| GDCA       | Quartile 1                         | 143 (24.9) | 138.0 (88.0,216.4)      | 0.88 |
|            | Quartile 4                         | 143 (24.9) | 150.5 (96.5,234.5)      |      |
| TDCA       | Quartile 1                         | 143 (24.9) | 19.7 (12.2,31.7)        | 0.85 |
|            | Quartile 4                         | 143 (24.9) | 21.7 (13.6,34.8)        |      |
| GLCA       | Quartile 1                         | 143 (24.9) | 17.3 (11.4,26.1)        | 0.41 |
|            | Quartile 4                         | 143 (24.9) | 15.0 (10.0,22.5)        |      |
| UDCA       | Quartile 1                         | 143 (24.9) | 19.1 (11.0,33.4)        | 0.61 |
|            | Quartile 4                         | 143 (24.9) | 15.6 (9.0,27.1)         |      |
| GUDCA      | Quartile 1                         | 143 (24.9) | 76.8 (51.4,114.9)       | 0.82 |
|            | Quartile 4                         | 143 (24.9) | 75.7 (50.9,112.6)       |      |
| TUDCA      | Quartile 1                         | 143 (24.9) | 3.6 (2.6,5.0)           | 0.92 |
|            | Quartile 4                         | 143 (24.9) | 3.6 (2.6,5.0)           |      |
| HCA        | Quartile 1                         | 143 (24.9) | 5.9 (3.7,9.4)           | 0.76 |
|            | Quartile 4                         | 143 (24.9) | 6.6 (4.1,10.4)          |      |
| GHCA       | Quartile 1                         | 143 (24.9) | 10.6 (8.1,13.8)         | 0.64 |
|            | Quartile 4                         | 143 (24.9) | 11.7 (9.0,15.1)         |      |
| THCA       | Quartile 1                         | 143 (24.9) | 2.2 (1.8,2.8)           | 0.53 |
|            | Quartile 4                         | 143 (24.9) | 2.3 (1.8,3.0)           |      |
| TaMCA      | Quartile 1                         | 143 (24.9) | 4.3 (3.0,6.1)           | 0.08 |
|            | Quartile 4                         | 143 (24.9) | 5.5 (3.9,7.9)           |      |

Geometric means (95 % confidence intervals) from Generalized Linear Models adjusted for age, sex, fasting status, smoking status, education level, physical activity level, BMI, height, and consumption of alcohol, fiber, fat, and energy;

\*CA (Cholic Acid); CDCA (Chenodeoxycholic Acid); DCA (Deoxycholic Acid); GCA (Glycocholic Acid); GCDCA (Glychenodeoxycholic Acid); GDCA (Glycodeoxycholic Acid); GHCA (Glycohyocholic Acid); GLCA (Glycolithocholic Acid); GUDCA (Glycoursodeoxycholic Acid); HCA (Hyocholic Acid); TaMCA (Tauro-Alpha-Muricholic Acid); TCA (Taurocholic Acid); TCDCA (Taurochenodeoxycholic Acid); TDCA (Taurodeoxycholic Acid); THCA (Taurohyocholic Acid); TUDCA (Tauroursodeoxycholic Acid); UDCA (Ursodeoxycholic Acid);

†Two-sided P value for linear trend from Generalized Linear Models;

**Supplementary Table 7** Geometric means (95% confidence intervals) of plasma bile acid concentrations across quartiles of fiber consumption

| Bile Acid* | Fiber consumption | Frequency  | Geometric Mean (95% CI) | P†   |
|------------|-------------------|------------|-------------------------|------|
| CA         | Quartile 1        | 143 (24.9) | 64.0 (34.0,120.2)       | 0.73 |
|            | Quartile 4        | 143 (24.9) | 73.0 (39.9,133.4)       |      |
| CDCA       | Quartile 1        | 143 (24.9) | 124.6 (70.8,219.3)      | 0.56 |
|            | Quartile 4        | 143 (24.9) | 146.1 (85.1,250.8)      |      |
| GCA        | Quartile 1        | 143 (24.9) | 135.3 (90.0,203.6)      | 0.06 |
|            | Quartile 4        | 143 (24.9) | 175.3 (118.6,259.0)     |      |
| TCA        | Quartile 1        | 143 (24.9) | 16.1 (9.9,26.2)         | 0.09 |
|            | Quartile 4        | 143 (24.9) | 20.1 (12.6,32.1)        |      |
| GCDCA      | Quartile 1        | 143 (24.9) | 594.1 (410.8,859.2)     | 0.09 |
|            | Quartile 4        | 143 (24.9) | 716.0 (503.2,1018.8)    |      |
| TCDCA      | Quartile 1        | 143 (24.9) | 65.8 (42.8,101.1)       | 0.09 |
|            | Quartile 4        | 143 (24.9) | 75.5 (50.0,114.0)       |      |
| DCA        | Quartile 1        | 143 (24.9) | 146.6 (89.3,240.5)      | 0.67 |
|            | Quartile 4        | 143 (24.9) | 154.6 (96.3,248.1)      |      |
| GDCA       | Quartile 1        | 143 (24.9) | 137.6 (87.1,217.5)      | 0.68 |
|            | Quartile 4        | 143 (24.9) | 149.8 (96.7,232.0)      |      |
| TDCA       | Quartile 1        | 143 (24.9) | 20.0 (12.3,32.4)        | 0.63 |
|            | Quartile 4        | 143 (24.9) | 20.9 (13.1,33.3)        |      |
| GLCA       | Quartile 1        | 143 (24.9) | 18.7 (12.3,28.3)        | 0.21 |
|            | Quartile 4        | 143 (24.9) | 16.8 (11.3,25.1)        |      |
| UDCA       | Quartile 1        | 143 (24.9) | 14.6 (8.3,25.7)         | 0.54 |
|            | Quartile 4        | 143 (24.9) | 15.7 (9.1,27.0)         |      |
| GUDCA      | Quartile 1        | 143 (24.9) | 70.2 (46.6,105.7)       | 0.96 |
|            | Quartile 4        | 143 (24.9) | 75.9 (51.3,112.3)       |      |
| TUDCA      | Quartile 1        | 143 (24.9) | 3.4 (2.4,4.7)           | 0.60 |
|            | Quartile 4        | 143 (24.9) | 3.7 (2.7,5.1)           |      |
| HCA        | Quartile 1        | 143 (24.9) | 5.9 (3.7,9.5)           | 0.73 |
|            | Quartile 4        | 143 (24.9) | 6.5 (4.1,10.2)          |      |
| GHCA       | Quartile 1        | 143 (24.9) | 10.3 (7.9,13.5)         | 0.03 |
|            | Quartile 4        | 143 (24.9) | 13.2 (10.2,17.1)        |      |
| THCA       | Quartile 1        | 143 (24.9) | 2.3 (1.8,2.9)           | 0.24 |
|            | Quartile 4        | 143 (24.9) | 2.5 (2.0,3.1)           |      |
| TaMCA      | Quartile 1        | 143 (24.9) | 5.0 (3.4,7.2)           | 0.67 |
|            | Quartile 4        | 143 (24.9) | 5.0 (3.5,7.1)           |      |

Geometric means (95 % confidence intervals) from Generalized Linear Models adjusted for age, sex, fasting status, smoking status, education level, physical activity level, BMI, height, and consumption of alcohol, red and processed meat, fat, and energy;

\*CA (Cholic Acid); CDCA (Chenodeoxycholic Acid); DCA (Deoxycholic Acid); GCA (Glycocholic Acid); GCDCA (Glycochenodeoxycholic Acid); GDCA (Glycodeoxycholic Acid); GHCA (Glycohyocholic Acid); GLCA (Glycolithocholic Acid); GUDCA (Glycoursodeoxycholic Acid); HCA (Hyocholic Acid); TaMCA (Tauro-Alpha-Muricholic Acid); TCA (Taurocholic Acid); TCDCA (Taurochenodeoxycholic Acid); TDCA (Taurodeoxycholic Acid); THCA (Taurohyocholic Acid); TUDCA (Tauroursodeoxycholic Acid); UDCA (Ursodeoxycholic Acid);

†Two-sided P value for linear trend from Generalized Linear Models;

**Supplementary Table 8** Geometric means (95% confidence intervals) of plasma bile acid concentrations across quartiles of fat consumption

| Bile Acid* | Fat consumption | Frequency  | Geometric Mean (95% CI) | P†   |
|------------|-----------------|------------|-------------------------|------|
| CA         | Quartile 1      | 143 (24.9) | 72.2 (37.0,141.0)       | 0.68 |
|            | Quartile 4      | 143 (24.9) | 65.9 (35.0,123.9)       |      |
| CDCA       | Quartile 1      | 143 (24.9) | 153.7 (84.4,280.2)      | 0.67 |
|            | Quartile 4      | 143 (24.9) | 121.9 (69.1,215.0)      |      |
| GCA        | Quartile 1      | 143 (24.9) | 140.7 (91.1,217.3)      | 0.95 |
|            | Quartile 4      | 143 (24.9) | 150.7 (99.9,227.2)      |      |
| TCA        | Quartile 1      | 143 (24.9) | 17.3 (10.3,29.0)        | 0.93 |
|            | Quartile 4      | 143 (24.9) | 18.0 (11.0,29.4)        |      |
| GCDCA      | Quartile 1      | 143 (24.9) | 657.8 (444.1,974.4)     | 0.69 |
|            | Quartile 4      | 143 (24.9) | 606.8 (418.5,879.8)     |      |
| TCDCA      | Quartile 1      | 143 (24.9) | 70.6 (44.7,111.5)       | 0.25 |
|            | Quartile 4      | 143 (24.9) | 72.8 (47.3,112.2)       |      |
| DCA        | Quartile 1      | 143 (24.9) | 173.2 (102.6,292.5)     | 0.22 |
|            | Quartile 4      | 143 (24.9) | 127.7 (77.8,209.5)      |      |
| GDCA       | Quartile 1      | 143 (24.9) | 148.8 (91.5,242.0)      | 0.86 |
|            | Quartile 4      | 143 (24.9) | 126.0 (79.6,199.5)      |      |
| TDCA       | Quartile 1      | 143 (24.9) | 22.0 (13.2,36.9)        | 0.69 |
|            | Quartile 4      | 143 (24.9) | 19.8 (12.2,32.2)        |      |
| GLCA       | Quartile 1      | 143 (24.9) | 17.2 (11.0,26.8)        | 0.81 |
|            | Quartile 4      | 143 (24.9) | 15.5 (10.2,23.7)        |      |
| UDCA       | Quartile 1      | 143 (24.9) | 17.6 (9.7,32.2)         | 0.77 |
|            | Quartile 4      | 143 (24.9) | 14.1 (8.0,25.0)         |      |
| GUDCA      | Quartile 1      | 143 (24.9) | 78.9 (51.1,121.9)       | 0.69 |
|            | Quartile 4      | 143 (24.9) | 71.1 (47.1,107.3)       |      |
| TUDCA      | Quartile 1      | 143 (24.9) | 3.7 (2.6,5.3)           | 0.71 |
|            | Quartile 4      | 143 (24.9) | 3.6 (2.5,5.0)           |      |
| HCA        | Quartile 1      | 143 (24.9) | 6.9 (4.1,11.4)          | 0.92 |
|            | Quartile 4      | 143 (24.9) | 6.2 (3.9,10.0)          |      |
| GHCA       | Quartile 1      | 143 (24.9) | 10.4 (7.8,13.8)         | 0.44 |
|            | Quartile 4      | 143 (24.9) | 12.4 (9.5,16.3)         |      |
| THCA       | Quartile 1      | 143 (24.9) | 2.3 (1.8,3.0)           | 0.84 |
|            | Quartile 4      | 143 (24.9) | 2.5 (1.9,3.2)           |      |
| TaMCA      | Quartile 1      | 143 (24.9) | 4.5 (3.0,6.6)           | 0.55 |
|            | Quartile 4      | 143 (24.9) | 5.3 (3.7,7.7)           |      |

Geometric means (95 % confidence intervals) from Generalized Linear Models adjusted for age, sex, fasting status, smoking status, education level, physical activity level, BMI, height, and consumption of alcohol, fiber, red and processed meat, and energy;

\*CA (Cholic Acid); CDCA (Chenodeoxycholic Acid); DCA (Deoxycholic Acid); GCA (Glycocholic Acid); GCDCA (Glycochenodeoxycholic Acid); GDCA (Glycodeoxycholic Acid); GHCA (Glycohyocholic Acid); GLCA (Glycolithocholic Acid); GUDCA (Glycoursodeoxycholic Acid); HCA (Hyocholic Acid); TaMCA (Tauro-Alpha-Muricholic Acid); TCA (Taurocholic Acid); TCDCA (Taurochenodeoxycholic Acid); TDCA (Taurodeoxycholic Acid); THCA (Taurohyocholic Acid); TUDCA (Tauroursodeoxycholic Acid); UDCA (Ursodeoxycholic Acid);

†Two-sided P value for linear trend from Generalized Linear Models;

**Supplementary Table 9** Geometric means (95% confidence intervals) of plasma bile acid concentrations across strata of alcohol intake

| <b>Bile Acid*</b> | <b>Alcohol Intake</b> | <b>Frequency</b> | <b>Geometric Mean (95% CI)</b> | <b>P†</b> |
|-------------------|-----------------------|------------------|--------------------------------|-----------|
| CA                | Non Consumer          | 111 (19.3)       | 90.8 (48.1,171.5)              | 0.43      |
|                   | <0-12 g/day           | 257 (44.8)       | 72.6 (40.2,131.2)              |           |
|                   | 12-24 g/day           | 94 (16.4)        | 65.3 (35.0,121.8)              |           |
|                   | >24 g/day             | 112 (19.5)       | 65.2 (34.9,121.7)              |           |
| CDCA              | Non Consumer          | 111 (19.3)       | 184.4 (104.4,325.8)            | 0.23      |
|                   | <0-12 g/day           | 257 (44.8)       | 137.8 (81.1,234.0)             |           |
|                   | 12-24 g/day           | 94 (16.4)        | 131.1 (74.9,229.2)             |           |
|                   | >24 g/day             | 112 (19.5)       | 130.5 (74.6,228.4)             |           |
| GCA               | Non Consumer          | 111 (19.3)       | 174.2 (115.7,262.4)            | 0.02      |
|                   | <0-12 g/day           | 257 (44.8)       | 134.2 (91.7,196.5)             |           |
|                   | 12-24 g/day           | 94 (16.4)        | 123.4 (82.6,184.5)             |           |
|                   | >24 g/day             | 112 (19.5)       | 164.4 (109.9,245.9)            |           |
| TCA               | Non Consumer          | 111 (19.3)       | 19.8 (12.1,32.3)               | 0.05      |
|                   | <0-12 g/day           | 257 (44.8)       | 15.8 (10.0,25.0)               |           |
|                   | 12-24 g/day           | 94 (16.4)        | 14.6 (9.0,23.7)                |           |
|                   | >24 g/day             | 112 (19.5)       | 21.1 (13.0,34.1)               |           |
| GCDCA             | Non Consumer          | 111 (19.3)       | 685.2 (472.5,993.7)            | 0.20      |
|                   | <0-12 g/day           | 257 (44.8)       | 585.3 (414.0,827.3)            |           |
|                   | 12-24 g/day           | 94 (16.4)        | 564.0 (391.5,812.5)            |           |
|                   | >24 g/day             | 112 (19.5)       | 676.0 (469.1,974.1)            |           |
| TCDCA             | Non Consumer          | 111 (19.3)       | 76.4 (49.5,117.9)              | 0.02      |
|                   | <0-12 g/day           | 257 (44.8)       | 60.6 (40.5,90.7)               |           |
|                   | 12-24 g/day           | 94 (16.4)        | 60.2 (39.3,92.1)               |           |
|                   | >24 g/day             | 112 (19.5)       | 83.2 (54.3,127.4)              |           |
| DCA               | Non Consumer          | 111 (19.3)       | 213.2 (129.8,350.3)            | 0.04      |
|                   | <0-12 g/day           | 257 (44.8)       | 167.2 (105.3,265.5)            |           |
|                   | 12-24 g/day           | 94 (16.4)        | 138.2 (84.9,225.1)             |           |
|                   | >24 g/day             | 112 (19.5)       | 130.9 (80.3,213.2)             |           |
| GDCA              | Non Consumer          | 111 (19.3)       | 174.5 (110.3,276.1)            | 0.07      |
|                   | <0-12 g/day           | 257 (44.8)       | 145.9 (95.1,223.7)             |           |
|                   | 12-24 g/day           | 94 (16.4)        | 115.2 (73.4,180.9)             |           |
|                   | >24 g/day             | 112 (19.5)       | 128.7 (82.0,202.1)             |           |
| TDCA              | Non Consumer          | 111 (19.3)       | 24.2 (14.9,39.5)               | 0.16      |
|                   | <0-12 g/day           | 257 (44.8)       | 20.1 (12.7,31.6)               |           |
|                   | 12-24 g/day           | 94 (16.4)        | 16.8 (10.4,27.1)               |           |
|                   | >24 g/day             | 112 (19.5)       | 21.0 (13.0,33.9)               |           |
| GLCA              | Non Consumer          | 111 (19.3)       | 18.3 (12.0,27.9)               | 0.22      |
|                   | <0-12 g/day           | 257 (44.8)       | 18.3 (12.4,27.1)               |           |
|                   | 12-24 g/day           | 94 (16.4)        | 14.5 (9.6,21.9)                |           |
|                   | >24 g/day             | 112 (19.5)       | 15.3 (10.1,23.1)               |           |

Table continued on next page;

**Supplementary Table 9 (continued)** Geometric means (95% confidence intervals) of plasma bile acid concentrations across strata of alcohol intake

| Bile Acid* | Alcohol Intake | Frequency  | Geometric Mean (95% CI) | P†    |
|------------|----------------|------------|-------------------------|-------|
| UDCA       | Non Consumer   | 111 (19.3) | 23.2 (13.1,40.9)        | 0.04  |
|            | <0-12 g/day    | 257 (44.8) | 15.2 (9.0,25.9)         |       |
|            | 12-24 g/day    | 94 (16.4)  | 16.3 (9.3,28.5)         |       |
|            | >24 g/day      | 112 (19.5) | 14.2 (8.1,24.8)         |       |
| GUDCA      | Non Consumer   | 111 (19.3) | 92.9 (61.7,139.9)       | 0.02  |
|            | <0-12 g/day    | 257 (44.8) | 66.6 (45.5,97.4)        |       |
|            | 12-24 g/day    | 94 (16.4)  | 67.2 (45.0,100.5)       |       |
|            | >24 g/day      | 112 (19.5) | 76.9 (51.4,114.9)       |       |
| TUDCA      | Non Consumer   | 111 (19.3) | 4.2 (3.0,5.9)           | 0.03  |
|            | <0-12 g/day    | 257 (44.8) | 3.4 (2.4,4.6)           |       |
|            | 12-24 g/day    | 94 (16.4)  | 3.2 (2.3,4.4)           |       |
|            | >24 g/day      | 112 (19.5) | 3.8 (2.7,5.3)           |       |
| HCA        | Non Consumer   | 111 (19.3) | 8.0 (5.0,12.9)          | 0.18  |
|            | <0-12 g/day    | 257 (44.8) | 6.2 (4.0,9.6)           |       |
|            | 12-24 g/day    | 94 (16.4)  | 5.8 (3.6,9.3)           |       |
|            | >24 g/day      | 112 (19.5) | 6.0 (3.8,9.7)           |       |
| GHCA       | Non Consumer   | 111 (19.3) | 12.2 (9.3,16.0)         | 0.29  |
|            | <0-12 g/day    | 257 (44.8) | 11.1 (8.7,14.3)         |       |
|            | 12-24 g/day    | 94 (16.4)  | 10.5 (8.0,13.6)         |       |
|            | >24 g/day      | 112 (19.5) | 11.8 (9.1,15.4)         |       |
| THCA       | Non Consumer   | 111 (19.3) | 2.5 (2.0,3.2)           | 0.57  |
|            | <0-12 g/day    | 257 (44.8) | 2.3 (1.9,2.9)           |       |
|            | 12-24 g/day    | 94 (16.4)  | 2.3 (1.8,2.9)           |       |
|            | >24 g/day      | 112 (19.5) | 2.4 (1.9,3.1)           |       |
| TaMCA      | Non Consumer   | 111 (19.3) | 6.3 (4.4,9.1)           | 0.004 |
|            | <0-12 g/day    | 257 (44.8) | 5.4 (3.8,7.6)           |       |
|            | 12-24 g/day    | 94 (16.4)  | 4.3 (3.0,6.1)           |       |
|            | >24 g/day      | 112 (19.5) | 4.1 (2.8,5.8)           |       |

Geometric means (95 % confidence intervals) from Generalized Linear Models adjusted for age, sex, fasting status, smoking status, education level, physical activity level, BMI, height, and consumption of fiber, red and processed meat, fat, and energy;

\*CA (Cholic Acid); CDCA (Chenodeoxycholic Acid); DCA (Deoxycholic Acid); GCA (Glycocholic Acid); GCDCA (Glycochenodeoxycholic Acid); GDCA (Glycodeoxycholic Acid); GHCA (Glycohyocholic Acid); GLCA (Glycolithocholic Acid); GUDCA (Glycoursodeoxycholic Acid); HCA (Hyocholic Acid); TaMCA (Tauro-Alpha-Muricholic Acid); TCA (Taurocholic Acid); TCDCA (Taurochenodeoxycholic Acid); TDCA (Taurodeoxycholic Acid); THCA (Taurohyocholic Acid); TUDCA (Tauroursodeoxycholic Acid); UDCA (Ursodeoxycholic Acid);

†Two-sided P value for linear trend from Generalized Linear Models;

**Supplementary Table 10** Odds ratios (95 % confidence intervals) for colon cancer across quartiles of *relative* concentrations of bile acids

| <b>Bile acid metabolite</b>         |             | <b>Quartile 1</b> | <b>Quartile 2</b> | <b>Quartile 3</b> | <b>Quartile 4</b> | <b>p<sub>trend</sub>*</b> |
|-------------------------------------|-------------|-------------------|-------------------|-------------------|-------------------|---------------------------|
| Cholic Acid (CA)                    | N Cases (%) | 150 (26.4)        | 122 (21.4)        | 152 (26.7)        | 145 (25.5)        | 0.77                      |
|                                     | OR (95%CI)  | Reference         | 0.81 (0.56-1.17)  | 1.07 (0.74-1.53)  | 0.95 (0.64-1.39)  |                           |
| Chenodeoxycholic Acid (CDCA)        | N Cases (%) | 144 (25.3)        | 143 (25.1)        | 132 (23.2)        | 150 (26.4)        | 0.43                      |
|                                     | OR (95%CI)  | Reference         | 0.93 (0.65-1.33)  | 0.90 (0.61-1.33)  | 0.98 (0.66-1.44)  |                           |
| Hyocholic Acid (HCA)                | N Cases (%) | 137 (24.1)        | 175 (30.8)        | 111 (19.5)        | 146 (25.7)        | 0.42                      |
|                                     | OR (95%CI)  | Reference         | 0.93 (0.66-1.31)  | 0.90 (0.60-1.35)  | 0.92 (0.63-1.36)  |                           |
| Tauro-Alpha-Muricholic Acid (TaMCA) | N Cases (%) | 110 (19.3)        | 153 (26.9)        | 152 (26.7)        | 154 (27.1)        | 0.28                      |
|                                     | OR (95%CI)  | Reference         | 0.88 (0.61-1.28)  | 0.96 (0.65-1.41)  | 0.98 (0.65-1.46)  |                           |
| Glycocholic Acid (GCA)              | N Cases (%) | 123 (21.6)        | 124 (21.8)        | 154 (27.1)        | 168 (29.5)        | 0.09                      |
|                                     | OR (95%CI)  | Reference         | 1.10 (0.77-1.57)  | 1.27 (0.89-1.81)  | 1.48 (1.04-2.12)  |                           |
| Taurocholic Acid (TCA)              | N Cases (%) | 139 (24.4)        | 126 (22.1)        | 135 (23.7)        | 169 (29.7)        | 0.45                      |
|                                     | OR (95%CI)  | Reference         | 0.96 (0.68-1.37)  | 0.98 (0.68-1.41)  | 1.29 (0.91-1.82)  |                           |
| Glycochenodeoxycholic Acid (GCDCA)  | N Cases (%) | 127 (22.3)        | 152 (26.7)        | 146 (25.7)        | 144 (25.3)        | 0.57                      |
|                                     | OR (95%CI)  | Reference         | 1.08 (0.76-1.52)  | 1.08 (0.75-1.56)  | 1.09 (0.75-1.57)  |                           |
| Taurochenodeoxycholic Acid (TCDCA)  | N Cases (%) | 121 (21.3)        | 159 (27.9)        | 148 (26.0)        | 141 (24.8)        | 0.62                      |
|                                     | OR (95%CI)  | Reference         | 1.28 (0.90-1.82)  | 1.29 (0.90-1.83)  | 1.14 (0.79-1.65)  |                           |
| Glycohyocholic Acid (GHCA)          | N Cases (%) | 158 (27.8)        | 125 (22.0)        | 136 (23.9)        | 150 (26.4)        | 0.27                      |
|                                     | OR (95%CI)  | Reference         | 0.76 (0.54-1.09)  | 0.83 (0.57-1.19)  | 0.98 (0.68-1.42)  |                           |
| Deoxycholic Acid (DCA)              | N Cases (%) | 135 (23.7)        | 136 (23.9)        | 171 (30.1)        | 127 (22.3)        | 0.30                      |
|                                     | OR (95%CI)  | Reference         | 1.02 (0.71-1.47)  | 1.22 (0.87-1.72)  | 0.90 (0.63-1.28)  |                           |
| Glycodeoxycholic Acid (GDCA)        | N Cases (%) | 144 (25.3)        | 143 (25.1)        | 132 (23.2)        | 150 (26.4)        | 0.40                      |
|                                     | OR (95%CI)  | Reference         | 0.93 (0.65-1.33)  | 0.90 (0.61-1.33)  | 0.98 (0.66-1.44)  |                           |
| Taurodeoxycholic Acid (TDCA)        | N Cases (%) | 129 (22.7)        | 149 (26.2)        | 124 (21.8)        | 167 (29.3)        | 0.65                      |
|                                     | OR (95%CI)  | Reference         | 0.81 (0.57-1.15)  | 0.98 (0.67-1.42)  | 1.12 (0.77-1.64)  |                           |
| Glycolithocholic Acid (GLCA)        | N Cases (%) | 159 (27.9)        | 154 (27.1)        | 132 (23.2)        | 124 (21.8)        | 0.12                      |
|                                     | OR (95%CI)  | Reference         | 0.94 (0.67-1.31)  | 0.73 (0.51-1.04)  | 0.78 (0.54-1.13)  |                           |
| Ursodeoxycholic Acid (UDCA)         | N Cases (%) | 147 (25.8)        | 138 (24.3)        | 147 (25.8)        | 137 (24.1)        | 0.99                      |
|                                     | OR (95%CI)  | Reference         | 0.85 (0.60-1.22)  | 1.04 (0.73-1.49)  | 0.89 (0.61-1.30)  |                           |
| Glycoursodeoxycholic Acid (GUDCA)   | N Cases (%) | 147 (25.8)        | 168 (29.5)        | 136 (23.9)        | 118 (20.7)        | 0.44                      |
|                                     | OR (95%CI)  | Reference         | 1.12 (0.79-1.58)  | 1.02 (0.72-1.47)  | 0.79 (0.54-1.17)  |                           |
| Tauroursodeoxycholic Acid (TUDCA)   | N Cases (%) | 130 (22.8)        | 212 (37.3)        | 114 (20.0)        | 113 (19.9)        | 0.63                      |
|                                     | OR (95%CI)  | Reference         | 0.96 (0.69-1.35)  | 1.03 (0.69-1.54)  | 0.87 (0.58-1.30)  |                           |

Results from conditional logistic regression analyses;

Conditioned on age, sex, study center, follow-up time, time of day at blood collection, fasting status, menopausal status (women), current use of exogenous hormones (women), and phase of menstrual cycle (women), and adjusted for education level, physical activity level, smoking, waist circumference, height, and consumption of red and processed meat, fat, fiber, and energy;

\*Two-sided P value for linear trend from logistic regression model with bile acid values on the log<sub>2</sub> scale as the independent variable;



**Supplementary Table 11** Odds ratios (95 % confidence intervals) for colon cancer across quartiles of bile acids, stratified by anatomic site

| Bile acid metabolite               |             | Quartile 1 | Quartile 2       | Quartile 3       | Quartile 4       | P <sub>trend</sub> * | P <sub>hetero.</sub> <sup>†</sup> |
|------------------------------------|-------------|------------|------------------|------------------|------------------|----------------------|-----------------------------------|
| Cholic Acid (CA)                   |             |            |                  |                  |                  |                      |                                   |
| PROXIMAL                           | N Cases (%) | 58 (25.7)  | 45 (19.9)        | 59 (26.1)        | 64 (28.3)        |                      | 0.79                              |
|                                    | OR (95%CI)  | Reference  | 0.57 (0.31-1.04) | 1.02 (0.53-1.96) | 1.25 (0.68-2.31) | 0.26                 |                                   |
| DISTAL                             | N Cases (%) | 48 (23.1)  | 53 (25.5)        | 53 (25.5)        | 54 (26.0)        |                      |                                   |
|                                    | OR (95%CI)  | Reference  | 2.0 (1.08-3.72)  | 1.50 (0.79-2.87) | 1.88 (0.92-3.83) | 0.20                 |                                   |
| Chenodeoxycholic Acid (CDCA)       |             |            |                  |                  |                  |                      |                                   |
| PROXIMAL                           | N Cases (%) | 58 (25.7)  | 55 (24.3)        | 51 (22.6)        | 62 (27.4)        |                      | 0.34                              |
|                                    | OR (95%CI)  | Reference  | 0.72 (0.38-1.36) | 0.89 (0.48-1.67) | 1.29 (0.67-2.48) | 0.23                 |                                   |
| DISTAL                             | N Cases (%) | 51 (24.5)  | 52 (25.0)        | 52 (25.0)        | 53 (25.5)        |                      |                                   |
|                                    | OR (95%CI)  | Reference  | 1.04 (0.56-1.91) | 1.30 (0.66-2.54) | 1.31 (0.67-2.59) | 0.86                 |                                   |
| Hyochoolic Acid (HCA)              |             |            |                  |                  |                  |                      |                                   |
| PROXIMAL                           | N Cases (%) | 57 (25.2)  | 54 (23.9)        | 67 (29.6)        | 48 (21.2)        |                      | 0.36                              |
|                                    | OR (95%CI)  | Reference  | 1.13 (0.61-2.10) | 1.58 (0.88-2.84) | 1.14 (0.59-2.18) | 0.09                 |                                   |
| DISTAL                             | N Cases (%) | 64 (30.8)  | 46 (22.1)        | 53 (25.5)        | 45 (21.6)        |                      |                                   |
|                                    | OR (95%CI)  | Reference  | 0.57 (0.31-1.04) | 0.85 (0.45-1.62) | 0.88 (0.43-1.82) | 0.73                 |                                   |
| Glycocholic Acid (GCA)             |             |            |                  |                  |                  |                      |                                   |
| PROXIMAL                           | N Cases (%) | 41 (18.1)  | 57 (25.2)        | 54 (23.9)        | 74 (32.7)        |                      | 0.29                              |
|                                    | OR (95%CI)  | Reference  | 1.23 (0.63-2.40) | 1.06 (0.54-2.10) | 1.83 (0.96-3.52) | 0.43                 |                                   |
| DISTAL                             | N Cases (%) | 38 (18.3)  | 47 (22.6)        | 51 (24.5)        | 72 (34.6)        |                      |                                   |
|                                    | OR (95%CI)  | Reference  | 1.32 (0.69-2.53) | 1.61 (0.80-3.23) | 2.07 (1.04-4.12) | 0.03                 |                                   |
| Taurocholic Acid (TCA)             |             |            |                  |                  |                  |                      |                                   |
| PROXIMAL                           | N Cases (%) | 44 (19.5)  | 55 (24.3)        | 54 (23.9)        | 73 (32.3)        |                      | 0.70                              |
|                                    | OR (95%CI)  | Reference  | 1.07 (0.56-2.05) | 1.41 (0.75-2.63) | 1.45 (0.80-2.60) | 0.49                 |                                   |
| DISTAL                             | N Cases (%) | 38 (18.3)  | 53 (25.5)        | 47 (22.6)        | 70 (33.7)        |                      |                                   |
|                                    | OR (95%CI)  | Reference  | 1.44 (0.76-2.74) | 0.84 (0.43-1.65) | 1.53 (0.82-2.89) | 0.25                 |                                   |
| Glycochenodeoxycholic Acid (GCDCA) |             |            |                  |                  |                  |                      |                                   |
| PROXIMAL                           | N Cases (%) | 41 (18.1)  | 63 (27.9)        | 57 (25.2)        | 65 (28.8)        |                      | 0.93                              |
|                                    | OR (95%CI)  | Reference  | 2.12 (1.14-3.92) | 1.27 (0.67-2.40) | 2.05 (1.03-4.06) | 0.41                 |                                   |
| DISTAL                             | N Cases (%) | 40 (19.2)  | 61 (29.3)        | 42 (20.2)        | 65 (31.3)        |                      |                                   |
|                                    | OR (95%CI)  | Reference  | 1.33 (0.71-2.51) | 0.79 (0.38-1.65) | 1.30 (0.63-2.70) | 0.52                 |                                   |
| Taurochenodeoxycholic Acid (TCDCA) |             |            |                  |                  |                  |                      |                                   |
| PROXIMAL                           | N Cases (%) | 40 (17.7)  | 65 (28.8)        | 59 (26.1)        | 62 (27.4)        |                      | 0.80                              |
|                                    | OR (95%CI)  | Reference  | 1.30 (0.73-2.32) | 1.54 (0.85-2.77) | 1.50 (0.83-2.74) | 0.34                 |                                   |
| DISTAL                             | N Cases (%) | 41 (19.7)  | 54 (26.0)        | 49 (23.6)        | 64 (30.8)        |                      |                                   |
|                                    | OR (95%CI)  | Reference  | 1.65 (0.86-3.14) | 0.86 (0.45-1.63) | 1.37 (0.70-2.68) | 0.62                 |                                   |
| Glychoyochoolic Acid (GHCA)        |             |            |                  |                  |                  |                      |                                   |
| PROXIMAL                           | N Cases (%) | 56 (24.8)  | 46 (20.4)        | 69 (30.5)        | 55 (24.3)        |                      | 0.24                              |
|                                    | OR (95%CI)  | Reference  | 1.34 (0.73-2.45) | 1.48 (0.83-2.61) | 1.47 (0.78-2.80) | 0.56                 |                                   |
| DISTAL                             | N Cases (%) | 53 (25.5)  | 34 (16.3)        | 57 (27.4)        | 64 (30.8)        |                      |                                   |
|                                    | OR (95%CI)  | Reference  | 1.88 (0.90-3.91) | 1.91 (0.98-3.69) | 2.42 (1.21-4.86) | 0.04                 |                                   |

Table continued on next page;

**Supplementary Table 11 (continued)** Odds ratios (95 % confidence intervals) for colon cancer across quartiles of bile acids, stratified by anatomic site

| Bile acid metabolite                       |             | Quartile 1 | Quartile 2       | Quartile 3       | Quartile 4       | P <sub>trend</sub> * | P <sub>hetero.</sub> † |
|--------------------------------------------|-------------|------------|------------------|------------------|------------------|----------------------|------------------------|
| <b>Tauro-Alpha-Murocholic Acid (TaMCA)</b> |             |            |                  |                  |                  |                      |                        |
| PROXIMAL                                   | N Cases (%) | 89 (39.4)  | 20 (8.8)         | 61 (27.0)        | 56 (24.8)        |                      | 0.17                   |
|                                            | OR (95%CI)  | Reference  | 0.90 (0.43-1.89) | 0.95 (0.55-1.64) | 1.05 (0.59-1.87) | 0.95                 |                        |
| DISTAL                                     | N Cases (%) | 57 (27.4)  | 26 (12.5)        | 60 (28.8)        | 65 (31.3)        |                      |                        |
|                                            | OR (95%CI)  | Reference  | 1.51 (0.69-3.30) | 1.74 (0.97-3.11) | 2.07 (1.11-3.86) | 0.05                 |                        |
| <b>Deoxycholic Acid (DCA)</b>              |             |            |                  |                  |                  |                      |                        |
| PROXIMAL                                   | N Cases (%) | 57 (25.2)  | 53 (23.5)        | 54 (23.9)        | 62 (27.4)        |                      | 0.47                   |
|                                            | OR (95%CI)  | Reference  | 0.84 (0.47-1.47) | 0.82 (0.44-1.52) | 1.14 (0.61-2.14) | 0.79                 |                        |
| DISTAL                                     | N Cases (%) | 37 (17.8)  | 48 (23.1)        | 71 (34.1)        | 52 (25.0)        |                      |                        |
|                                            | OR (95%CI)  | Reference  | 1.35 (0.68-2.65) | 2.32 (1.22-4.42) | 1.36 (0.70-2.66) | 0.23                 |                        |
| <b>Glycodeoxycholic Acid (GDCA)</b>        |             |            |                  |                  |                  |                      |                        |
| PROXIMAL                                   | N Cases (%) | 49 (21.7)  | 59 (26.1)        | 52 (23.0)        | 66 (29.2)        |                      | 0.13                   |
|                                            | OR (95%CI)  | Reference  | 1.24 (0.68-2.26) | 1.02 (0.54-1.93) | 1.41 (0.73-2.71) | 0.85                 |                        |
| DISTAL                                     | N Cases (%) | 28 (13.5)  | 50 (24.0)        | 65 (31.3)        | 65 (31.3)        |                      |                        |
|                                            | OR (95%CI)  | Reference  | 1.28 (0.64-2.59) | 1.66 (0.83-3.29) | 1.83 (0.86-3.91) | 0.07                 |                        |
| <b>Taurodeoxycholic Acid (TDCA)</b>        |             |            |                  |                  |                  |                      |                        |
| PROXIMAL                                   | N Cases (%) | 46 (20.4)  | 65 (28.8)        | 60 (26.5)        | 55 (24.3)        |                      | 0.34                   |
|                                            | OR (95%CI)  | Reference  | 1.26 (0.68-2.33) | 1.42 (0.78-2.61) | 1.0 (0.51-1.94)  | 0.95                 |                        |
| DISTAL                                     | N Cases (%) | 32 (15.4)  | 49 (23.6)        | 61 (29.3)        | 66 (31.7)        |                      |                        |
|                                            | OR (95%CI)  | Reference  | 1.19 (0.60-2.39) | 1.10 (0.56-2.14) | 1.66 (0.81-3.42) | 0.19                 |                        |
| <b>Glycolithocholic Acid (GLCA)</b>        |             |            |                  |                  |                  |                      |                        |
| PROXIMAL                                   | N Cases (%) | 54 (23.9)  | 66 (29.2)        | 58 (25.7)        | 48 (21.2)        |                      | 0.18                   |
|                                            | OR (95%CI)  | Reference  | 1.34 (0.71-2.52) | 0.85 (0.46-1.54) | 0.62 (0.33-1.19) | 0.02                 |                        |
| DISTAL                                     | N Cases (%) | 49 (23.6)  | 56 (26.9)        | 46 (22.1)        | 57 (27.4)        |                      |                        |
|                                            | OR (95%CI)  | Reference  | 0.78 (0.43-1.43) | 0.73 (0.37-1.46) | 0.87 (0.43-1.77) | 0.83                 |                        |
| <b>Ursodeoxycholic Acid (UDCA)</b>         |             |            |                  |                  |                  |                      |                        |
| PROXIMAL                                   | N Cases (%) | 55 (24.3)  | 56 (24.8)        | 49 (21.7)        | 66 (29.2)        |                      | 0.39                   |
|                                            | OR (95%CI)  | Reference  | 0.74 (0.40-1.37) | 0.71 (0.38-1.31) | 1.67 (0.89-3.14) | 0.17                 |                        |
| DISTAL                                     | N Cases (%) | 61 (29.3)  | 45 (21.6)        | 54 (26.0)        | 48 (23.1)        |                      |                        |
|                                            | OR (95%CI)  | Reference  | 0.63 (0.34-1.18) | 1.06 (0.56-1.97) | 0.83 (0.44-1.57) | 0.91                 |                        |
| <b>Glycoursodeoxycholic Acid (GUDCA)</b>   |             |            |                  |                  |                  |                      |                        |
| PROXIMAL                                   | N Cases (%) | 56 (24.8)  | 66 (29.2)        | 37 (16.4)        | 67 (29.6)        |                      | 0.65                   |
|                                            | OR (95%CI)  | Reference  | 0.95 (0.54-1.70) | 0.54 (0.28-1.02) | 1.47 (0.78-2.76) | 0.96                 |                        |
| DISTAL                                     | N Cases (%) | 43 (20.7)  | 72 (34.6)        | 37 (17.8)        | 56 (26.9)        |                      |                        |
|                                            | OR (95%CI)  | Reference  | 1.96 (1.07-3.59) | 0.95 (0.47-1.96) | 1.26 (0.65-2.44) | 0.52                 |                        |
| <b>Tauroursodeoxycholic Acid (TUDCA)</b>   |             |            |                  |                  |                  |                      |                        |
| PROXIMAL                                   | N Cases (%) | 62 (27.4)  | 67 (29.6)        | 34 (15.0)        | 63 (27.9)        |                      | 0.81                   |
|                                            | OR (95%CI)  | Reference  | 1.34 (0.77-2.32) | 0.68 (0.35-1.33) | 1.34 (0.76-2.38) | 0.63                 |                        |
| DISTAL                                     | N Cases (%) | 56 (26.9)  | 55 (26.4)        | 39 (18.8)        | 58 (27.9)        |                      |                        |
|                                            | OR (95%CI)  | Reference  | 0.80 (0.44-1.46) | 0.90 (0.44-1.82) | 0.99 (0.52-1.87) | 0.92                 |                        |

Results from conditional logistic regression analyses;

Conditioned on age, sex, study center, follow-up time, time of day at blood collection, fasting status, menopausal status (women), current use of exogenous hormones (women), and phase of menstrual cycle (women), and adjusted for education level, physical activity level, smoking, waist circumference, height, and consumption of red and processed meat, fat, fiber, and energy;

\*Two-sided P value for linear trend from logistic regression model with bile acid values on the log<sub>2</sub> scale as the independent variable;

† Two-sided P value for heterogeneity from  $X^2$  tests

**Supplementary Table 12** Odds ratios (95 % confidence intervals) for colon cancer across quartiles of bile acids, stratified by sex

| Bile acid metabolite               |             | Quartile 1 | Quartile 2       | Quartile 3       | Quartile 4       | P <sub>trend</sub> * | P <sub>hetero.</sub> <sup>†</sup> |
|------------------------------------|-------------|------------|------------------|------------------|------------------|----------------------|-----------------------------------|
| Cholic Acid (CA)                   |             |            |                  |                  |                  |                      |                                   |
| WOMEN                              | N Cases (%) | 76 (21.3)  | 91 (25.6)        | 91 (25.6)        | 98 (27.5)        |                      | 0.40                              |
|                                    | OR (95%CI)  | Reference  | 1.24 (0.78-1.96) | 1.17 (0.71-1.93) | 1.41 (0.86-2.32) | 0.13                 |                                   |
| MEN                                | N Cases (%) | 53 (24.9)  | 43 (20.2)        | 68 (31.9)        | 49 (23.0)        |                      |                                   |
|                                    | OR (95%CI)  | Reference  | 0.72 (0.39-1.32) | 1.32 (0.70-2.49) | 0.77 (0.40-1.47) | 0.75                 |                                   |
| Chenodeoxycholic Acid (CDCA)       |             |            |                  |                  |                  |                      |                                   |
| WOMEN                              | N Cases (%) | 81 (22.8)  | 86 (24.2)        | 99 (27.8)        | 90 (25.3)        |                      | 0.22                              |
|                                    | OR (95%CI)  | Reference  | 1.06 (0.67-1.68) | 1.2 (0.76-1.90)  | 1.18 (0.73-1.89) | 0.34                 |                                   |
| MEN                                | N Cases (%) | 51 (23.9)  | 46 (21.6)        | 68 (31.9)        | 48 (22.5)        |                      |                                   |
|                                    | OR (95%CI)  | Reference  | 0.7 (0.35-1.40)  | 1.14 (0.57-2.27) | 0.79 (0.40-1.58) | 0.23                 |                                   |
| Hyochoolic Acid (HCA)              |             |            |                  |                  |                  |                      |                                   |
| WOMEN                              | N Cases (%) | 88 (24.7)  | 79 (22.2)        | 110 (30.9)       | 79 (22.2)        |                      | 0.07                              |
|                                    | OR (95%CI)  | Reference  | 0.8 (0.49-1.31)  | 1.31 (0.82-2.08) | 0.94 (0.57-1.53) | 0.45                 |                                   |
| MEN                                | N Cases (%) | 53 (24.9)  | 52 (24.4)        | 60 (28.2)        | 48 (22.5)        |                      |                                   |
|                                    | OR (95%CI)  | Reference  | 0.88 (0.48-1.64) | 1.04 (0.55-1.95) | 0.91 (0.46-1.80) | 0.84                 |                                   |
| Glycocholic Acid (GCA)             |             |            |                  |                  |                  |                      |                                   |
| WOMEN                              | N Cases (%) | 67 (18.8)  | 65 (18.3)        | 87 (24.4)        | 137 (38.5)       |                      | 0.07                              |
|                                    | OR (95%CI)  | Reference  | 0.89 (0.53-1.48) | 1.52 (0.91-2.55) | 2.52 (1.52-4.20) | <0.001               |                                   |
| MEN                                | N Cases (%) | 48 (22.5)  | 63 (29.6)        | 44 (20.7)        | 58 (27.2)        |                      |                                   |
|                                    | OR (95%CI)  | Reference  | 1.41 (0.79-2.53) | 1.01 (0.54-1.90) | 1.25 (0.67-2.34) | 0.89                 |                                   |
| Taurocholic Acid (TCA)             |             |            |                  |                  |                  |                      |                                   |
| WOMEN                              | N Cases (%) | 64 (18.0)  | 86 (24.2)        | 81 (22.8)        | 125 (35.1)       |                      | 0.11                              |
|                                    | OR (95%CI)  | Reference  | 1.36 (0.83-2.25) | 1.28 (0.78-2.10) | 2.46 (1.49-4.08) | 0.006                |                                   |
| MEN                                | N Cases (%) | 48 (22.5)  | 53 (24.9)        | 50 (23.5)        | 62 (29.1)        |                      |                                   |
|                                    | OR (95%CI)  | Reference  | 1.12 (0.62-2.03) | 1.05 (0.56-1.97) | 1.18 (0.65-2.15) | 0.80                 |                                   |
| Glycochenodeoxycholic Acid (GCDCA) |             |            |                  |                  |                  |                      |                                   |
| WOMEN                              | N Cases (%) | 63 (17.7)  | 91 (25.6)        | 85 (23.9)        | 117 (32.9)       |                      | 0.53                              |
|                                    | OR (95%CI)  | Reference  | 1.46 (0.92-2.34) | 1.19 (0.73-1.94) | 2.22 (1.33-3.71) | 0.007                |                                   |
| MEN                                | N Cases (%) | 55 (25.8)  | 56 (26.3)        | 58 (27.2)        | 44 (20.7)        |                      |                                   |
|                                    | OR (95%CI)  | Reference  | 1.11 (0.59-2.06) | 0.96 (0.51-1.79) | 0.78 (0.40-1.54) | 0.68                 |                                   |
| Taurochenodeoxycholic Acid (TCDCA) |             |            |                  |                  |                  |                      |                                   |
| WOMEN                              | N Cases (%) | 59 (16.6)  | 95 (26.7)        | 80 (22.5)        | 122 (34.3)       |                      | 0.26                              |
|                                    | OR (95%CI)  | Reference  | 1.49 (0.93-2.40) | 1.32 (0.81-2.15) | 2.23 (1.37-3.65) | 0.009                |                                   |
| MEN                                | N Cases (%) | 46 (21.6)  | 57 (26.8)        | 56 (26.3)        | 54 (25.4)        |                      |                                   |
|                                    | OR (95%CI)  | Reference  | 1.22 (0.67-2.24) | 1.11 (0.61-2.03) | 0.99 (0.53-1.85) | 0.99                 |                                   |
| Glychoyochoolic Acid (GHCA)        |             |            |                  |                  |                  |                      |                                   |
| WOMEN                              | N Cases (%) | 105 (29.5) | 40 (11.2)        | 108 (30.3)       | 103 (28.9)       |                      | 0.34                              |
|                                    | OR (95%CI)  | Reference  | 1.04 (0.61-1.79) | 1.51 (0.98-2.32) | 1.71 (1.06-2.77) | 0.02                 |                                   |
| MEN                                | N Cases (%) | 47 (22.1)  | 65 (30.5)        | 50 (23.5)        | 51 (23.9)        |                      |                                   |
|                                    | OR (95%CI)  | Reference  | 1.66 (0.92-3.01) | 1.13 (0.60-2.12) | 1.36 (0.70-2.65) | 0.95                 |                                   |

Table continued on next page;

**Supplementary Table 12 (continued)** Odds ratios (95 % confidence intervals) for colon cancer across quartiles of bile acids, stratified by sex

| Bile acid metabolite                       |             | Quartile 1 | Quartile 2       | Quartile 3       | Quartile 4       | p <sub>trend</sub> * | p <sub>hetero.</sub> † |
|--------------------------------------------|-------------|------------|------------------|------------------|------------------|----------------------|------------------------|
| <b>Tauro-Alpha-Murocholic Acid (TaMCA)</b> |             |            |                  |                  |                  |                      |                        |
| WOMEN                                      | N Cases (%) | 48 (13.5)  | 117 (32.9)       | 103 (28.9)       | 88 (24.7)        |                      | 0.51                   |
|                                            | OR (95%CI)  | Reference  | 1.62 (1.00-2.61) | 1.81 (1.06-3.08) | 1.52 (0.88-2.63) | 0.46                 |                        |
| MEN                                        | N Cases (%) | 32 (15.0)  | 60 (28.2)        | 64 (30.0)        | 57 (26.8)        |                      | 0.07                   |
|                                            | OR (95%CI)  | Reference  | 1.15 (0.59-2.21) | 1.72 (0.85-3.47) | 1.65 (0.79-3.44) |                      |                        |
| <b>Deoxycholic Acid (DCA)</b>              |             |            |                  |                  |                  |                      |                        |
| WOMEN                                      | N Cases (%) | 87 (24.5)  | 78 (22.0)        | 103 (29.0)       | 87 (24.5)        |                      | 0.16                   |
|                                            | OR (95%CI)  | Reference  | 0.89 (0.57-1.40) | 1.13 (0.72-1.78) | 0.91 (0.56-1.47) | 0.71                 |                        |
| MEN                                        | N Cases (%) | 41 (19.2)  | 54 (25.4)        | 59 (27.7)        | 59 (27.7)        |                      | 0.69                   |
|                                            | OR (95%CI)  | Reference  | 1.31 (0.71-2.41) | 1.72 (0.92-3.24) | 1.20 (0.63-2.31) |                      |                        |
| <b>Glycodeoxycholic Acid (GDCA)</b>        |             |            |                  |                  |                  |                      |                        |
| WOMEN                                      | N Cases (%) | 65 (18.3)  | 80 (22.5)        | 111 (31.2)       | 100 (28.1)       |                      | 0.23                   |
|                                            | OR (95%CI)  | Reference  | 1.35 (0.82-2.22) | 1.69 (1.05-2.73) | 1.58 (0.92-2.71) | 0.19                 |                        |
| MEN                                        | N Cases (%) | 40 (18.8)  | 61 (28.6)        | 44 (20.7)        | 68 (31.9)        |                      | 0.46                   |
|                                            | OR (95%CI)  | Reference  | 1.78 (0.94-3.37) | 1.11 (0.55-2.24) | 2.20 (1.06-4.60) |                      |                        |
| <b>Taurodeoxycholic Acid (TDCA)</b>        |             |            |                  |                  |                  |                      |                        |
| WOMEN                                      | N Cases (%) | 67 (18.8)  | 93 (26.1)        | 97 (27.2)        | 99 (27.8)        |                      | 0.66                   |
|                                            | OR (95%CI)  | Reference  | 1.54 (0.95-2.50) | 1.39 (0.86-2.24) | 1.54 (0.91-2.62) | 0.22                 |                        |
| MEN                                        | N Cases (%) | 46 (21.6)  | 41 (19.2)        | 65 (30.5)        | 61 (28.6)        |                      | 0.44                   |
|                                            | OR (95%CI)  | Reference  | 0.91 (0.48-1.74) | 1.25 (0.68-2.30) | 1.37 (0.69-2.72) |                      |                        |
| <b>Glycolithocholic Acid (GLCA)</b>        |             |            |                  |                  |                  |                      |                        |
| WOMEN                                      | N Cases (%) | 94 (26.4)  | 83 (23.3)        | 100 (28.1)       | 79 (22.2)        |                      | 0.11                   |
|                                            | OR (95%CI)  | Reference  | 0.74 (0.47-1.18) | 1.01 (0.62-1.64) | 0.76 (0.46-1.26) | 0.41                 |                        |
| MEN                                        | N Cases (%) | 44 (20.7)  | 70 (32.9)        | 44 (20.7)        | 55 (25.8)        |                      | 0.68                   |
|                                            | OR (95%CI)  | Reference  | 1.50 (0.80-2.81) | 1.16 (0.60-2.24) | 1.50 (0.75-2.99) |                      |                        |
| <b>Ursodeoxycholic Acid (UDCA)</b>         |             |            |                  |                  |                  |                      |                        |
| WOMEN                                      | N Cases (%) | 107 (30.1) | 66 (18.5)        | 82 (23.0)        | 101 (28.4)       |                      | 0.06                   |
|                                            | OR (95%CI)  | Reference  | 0.49 (0.30-0.78) | 0.70 (0.44-1.10) | 0.87 (0.54-1.38) | 0.65                 |                        |
| MEN                                        | N Cases (%) | 40 (18.8)  | 78 (36.6)        | 53 (24.9)        | 42 (19.7)        |                      | 0.58                   |
|                                            | OR (95%CI)  | Reference  | 2.03 (0.98-4.18) | 1.26 (0.65-2.45) | 1.00 (0.51-1.98) |                      |                        |
| <b>Glycoursodeoxycholic Acid (GUDCA)</b>   |             |            |                  |                  |                  |                      |                        |
| WOMEN                                      | N Cases (%) | 77 (21.6)  | 104 (29.2)       | 73 (20.5)        | 102 (28.7)       |                      | 0.78                   |
|                                            | OR (95%CI)  | Reference  | 1.48 (0.94-2.33) | 0.97 (0.60-1.56) | 1.40 (0.87-2.25) | 0.16                 |                        |
| MEN                                        | N Cases (%) | 43 (20.2)  | 84 (39.4)        | 36 (16.9)        | 50 (23.5)        |                      | 0.41                   |
|                                            | OR (95%CI)  | Reference  | 1.96 (1.02-3.75) | 0.93 (0.46-1.86) | 1.23 (0.61-2.49) |                      |                        |
| <b>Tauroursodeoxycholic Acid (TUDCA)</b>   |             |            |                  |                  |                  |                      |                        |
| WOMEN                                      | N Cases (%) | 103 (28.9) | 98 (27.5)        | 48 (13.5)        | 107 (30.1)       |                      | 0.63                   |
|                                            | OR (95%CI)  | Reference  | 1.02 (0.68-1.55) | 0.79 (0.45-1.38) | 1.33 (0.86-2.06) | 0.14                 |                        |
| MEN                                        | N Cases (%) | 50 (23.5)  | 62 (29.1)        | 54 (25.4)        | 47 (22.1)        |                      | 0.53                   |
|                                            | OR (95%CI)  | Reference  | 1.31 (0.72-2.38) | 1.09 (0.58-2.07) | 0.95 (0.49-1.83) |                      |                        |

Results from conditional logistic regression analyses;

Conditioned on age, sex, study center, follow-up time, time of day at blood collection, fasting status, menopausal status (women), current use of exogenous hormones (women), and phase of menstrual cycle (women), and adjusted for education level, physical activity level, smoking, waist circumference, height, and consumption of red and processed meat, fat, fiber, and energy;

\*Two-sided P value for linear trend from logistic regression model with bile acid values on the log<sub>2</sub> scale as the independent variable;

† Two-sided P value for heterogeneity from X<sup>2</sup> tests

**Supplementary Table 13** Odds ratios (95 % confidence intervals) for colon cancer among participants in the highest quartile of bile acid levels before and after correction for measurement error

| <b>Bile acid metabolite</b>          | <b>Pearson's r</b> | <b>Uncorrected Odds Ratio</b> | <b>Corrected Odds Ratio</b> |
|--------------------------------------|--------------------|-------------------------------|-----------------------------|
| Primary unconjugated bile acids      |                    |                               |                             |
| Cholic Acid (CA)                     | 0.55               | 1.32 (0.90, 1.94)             | 1.55 (0.81, 3.35)           |
| Chenodeoxycholic Acid (CDCA)         | 0.63               | 1.12 (0.77, 1.64)             | 1.24 (0.70, 2.26)           |
| Hyochoolic Acid (HCA)                | 0.57               | 0.89 (0.61, 1.31)             | 0.73 (0.35, 1.38)           |
| Primary conjugated bile acids        |                    |                               |                             |
| Glycocholic Acid (GCA)               | 0.45               | 2.22 (1.52, 3.26)             | 4.78 (2.01, 29.89)          |
| Taurocholic Acid (TCA)               | 0.56               | 1.78 (1.23, 2.58)             | 2.68 (1.42, 6.47)           |
| Glycochenodeoxycholic Acid (GCDCA)   | 0.46               | 1.68 (1.13, 2.48)             | 2.96 (1.31, 12.24)          |
| Taurochenodeoxycholic Acid (TCDCA)   | 0.51               | 1.62 (1.11, 2.36)             | 2.56 (1.28, 7.33)           |
| Glycohyocholic Acid (GHCA)           | 0.28               | 1.65 (1.13, 2.40)             | Not estimated*              |
| Tauro-Alpha, Muricholic Acid (TaMCA) | 0.50               | 1.38 (0.98, 1.94)             | 1.66 (0.87, 3.93)           |
| Secondary unconjugated bile acids    |                    |                               |                             |
| Deoxycholic Acid (DCA)               | 0.73               | 1.11 (0.76, 1.61)             | 1.23 (0.77, 2.03)           |
| Secondary conjugated bile acids      |                    |                               |                             |
| Glycodeoxycholic Acid (GDCA)         | 0.57               | 1.68 (1.12, 2.54)             | 2.68 (1.35, 6.70)           |
| Taurodeoxycholic Acid (TDCA)         | 0.63               | 1.54 (1.02, 2.31)             | 2.06 (1.11, 4.26)           |
| Glycolithocholic Acid (GLCA)         | 0.14               | 0.91 (0.62, 1.35)             | Not estimated*              |
| Tertiary unconjugated bile acids     |                    |                               |                             |
| Ursodeoxycholic Acid (UDCA)          | 0.28               | 0.98 (0.68, 1.41)             | Not estimated*              |
| Tertiary conjugated bile acids       |                    |                               |                             |
| Glycoursodeoxycholic Acid (GUDCA)    | 0.59               | 1.36 (0.94, 1.96)             | 1.41 (0.78, 2.76)           |
| Tauroursodeoxycholic Acid (TUDCA)    | 0.43               | 1.26 (0.88, 1.79)             | 1.50 (0.68, 4.48)           |

\*Correlations at Pearson's coefficients below 0.3 were considered as too low for measurement error correction;
